# Supplementary material
Source: publisher site journal article supplement (https://www.dovepress.com/article/509059)
Supplement: Supplementary file 1 [file get_supplementary_file.php]

**Supplementary materials**

Figure S1: Comparison of PSQI total scores for age between potential classes of sleep patterns in patients with CHF


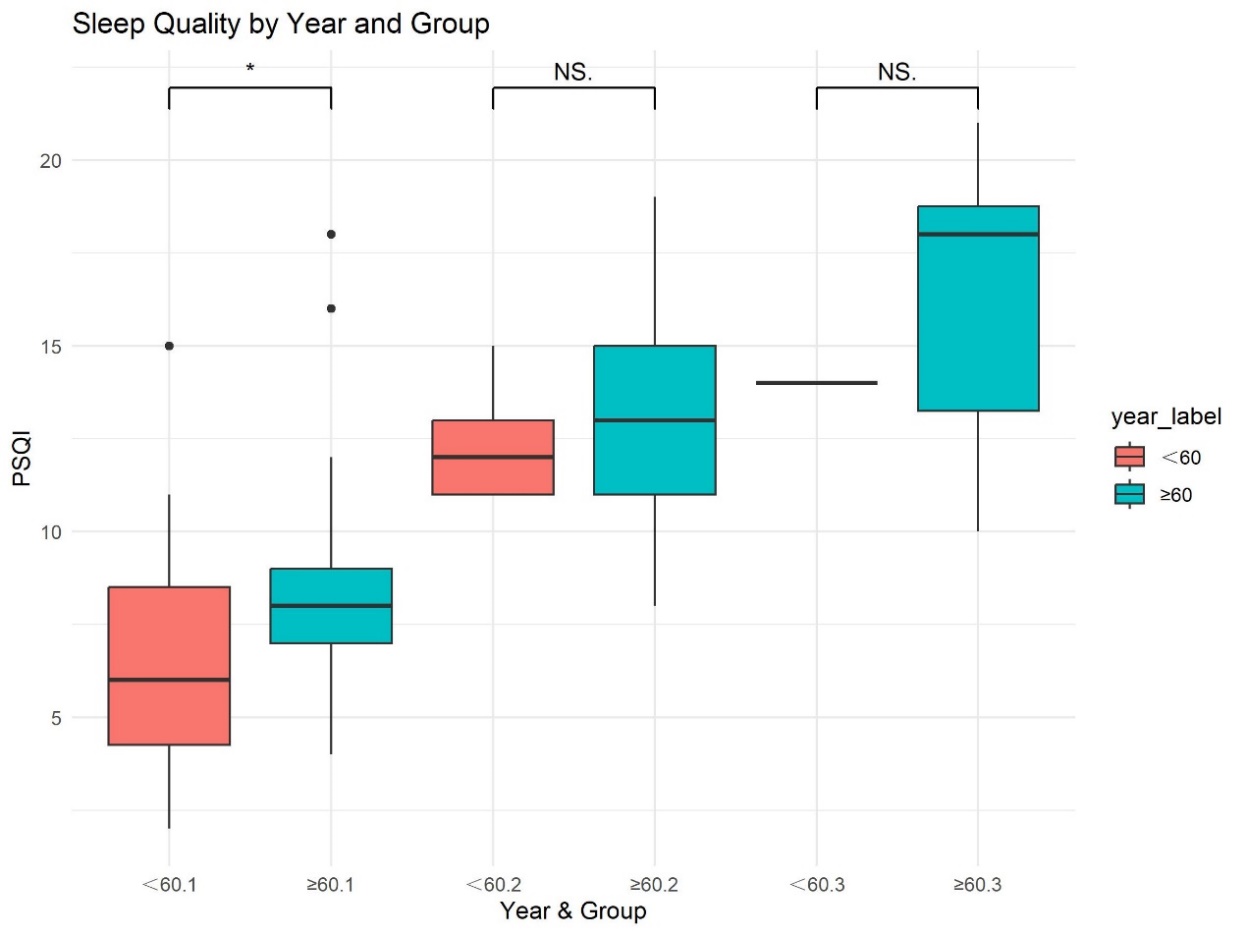


**Figure S1:** *, P < 0.05; NS, Not Significant

Figure S2: Comparison of PSQI total scores for gender between potential classes of sleep patterns in patients with CHF


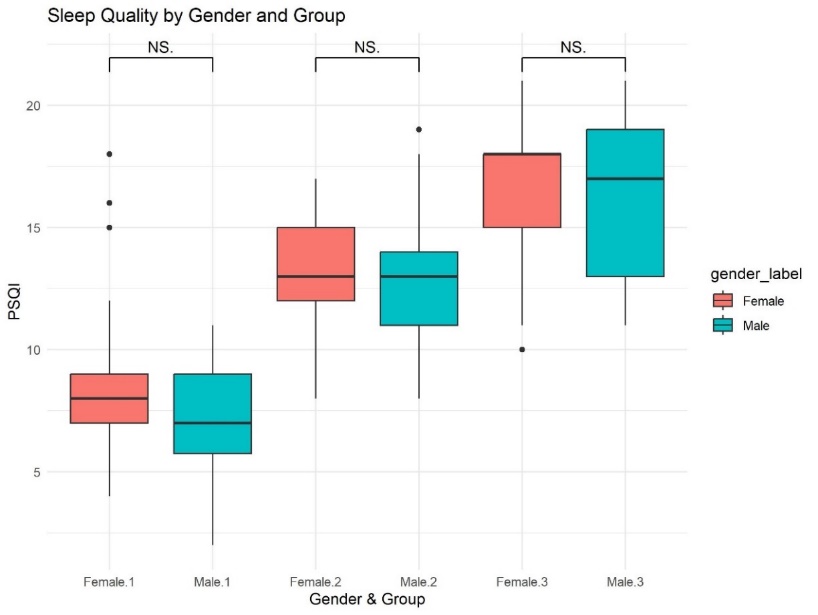


**Figure S2:** NS, Not Significant

Figure S3: Comparison of PSQI total scores for education level between potential classes of sleep patterns in patients with CHF


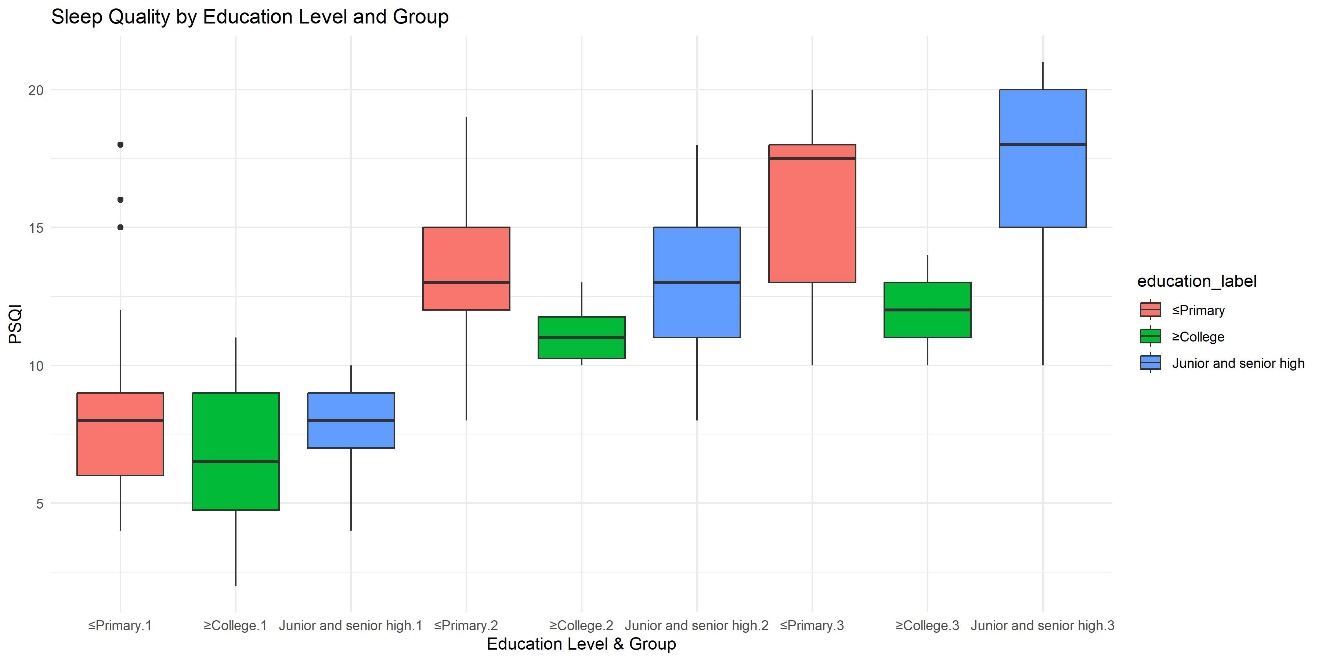


Figure S4: Comparison of PSQI total scores for occupation between potential classes of sleep patterns in patients with CHF


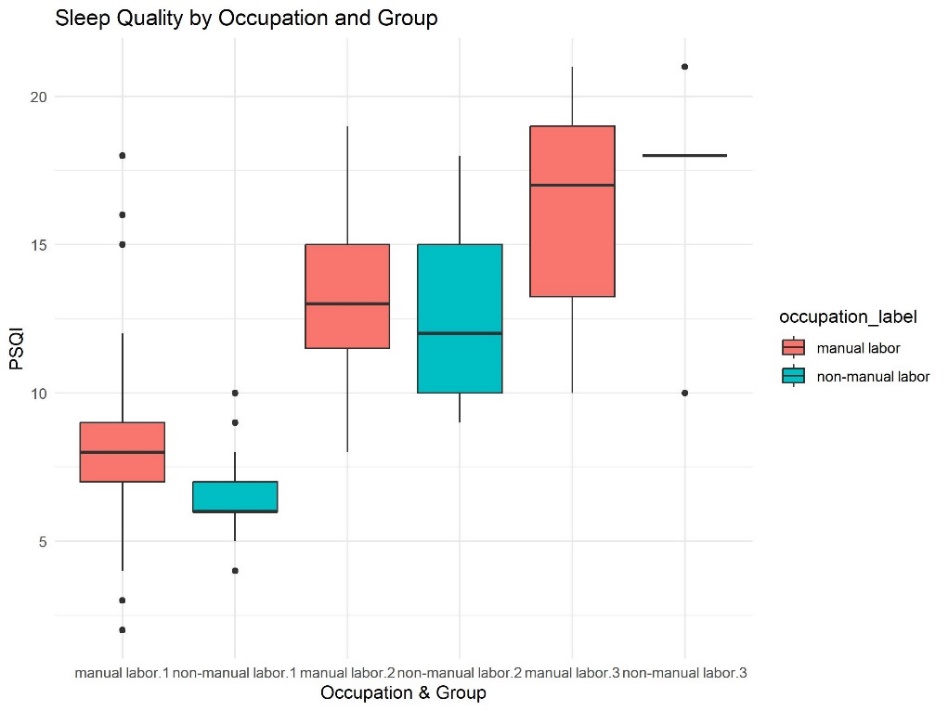


Figure S5: Comparison of PSQI total scores for monthly income between potential classes of sleep patterns in patients with CHF


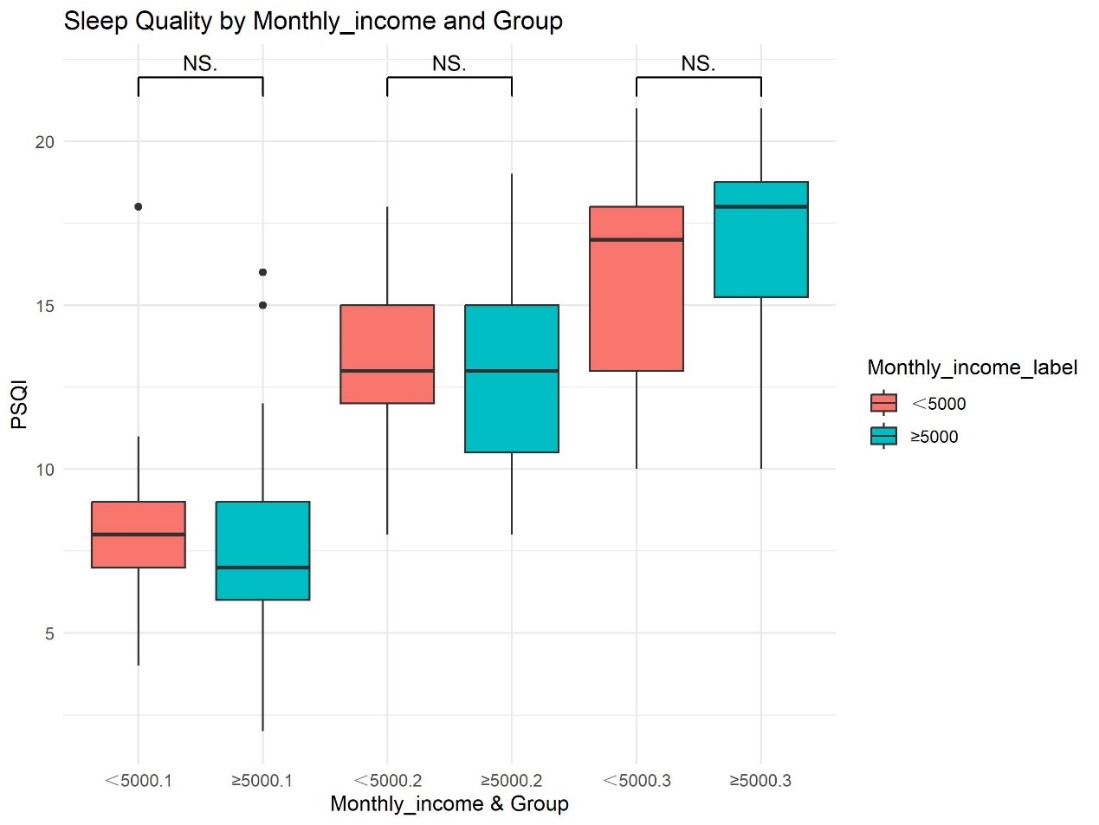


**Figure S5:** NS, Not Significant

Figure S6: Comparison of PSQI total scores for caregiver between potential classes of sleep patterns in patients with CHF
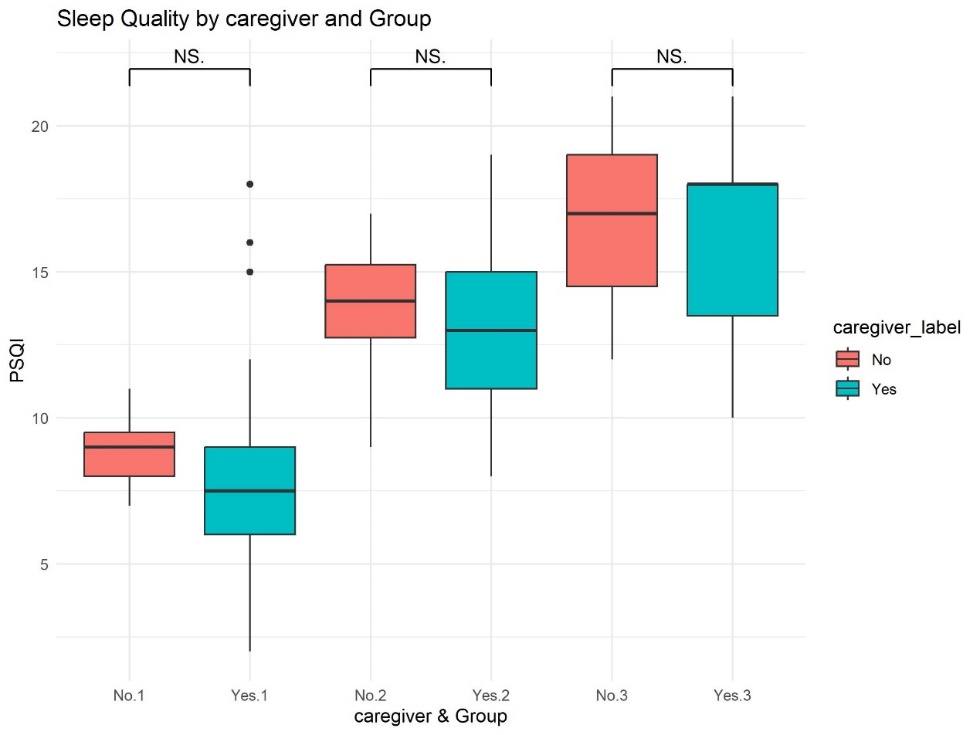


**Figure S6:** NS, Not Significant

Figure S7: Comparison of PSQI total scores for the number of comorbidities between potential classes of sleep patterns in patients with CHF


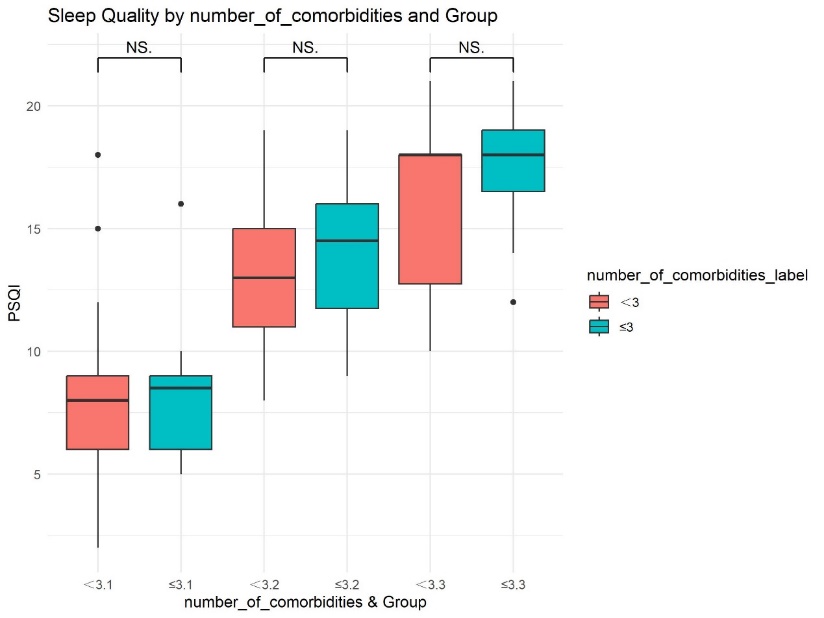


**Figure S7:** NS, Not Significant

Figure S8: Comparison of PSQI total scores for HF hospitalizations in the last year between potential classes of sleep patterns in patients with CHF


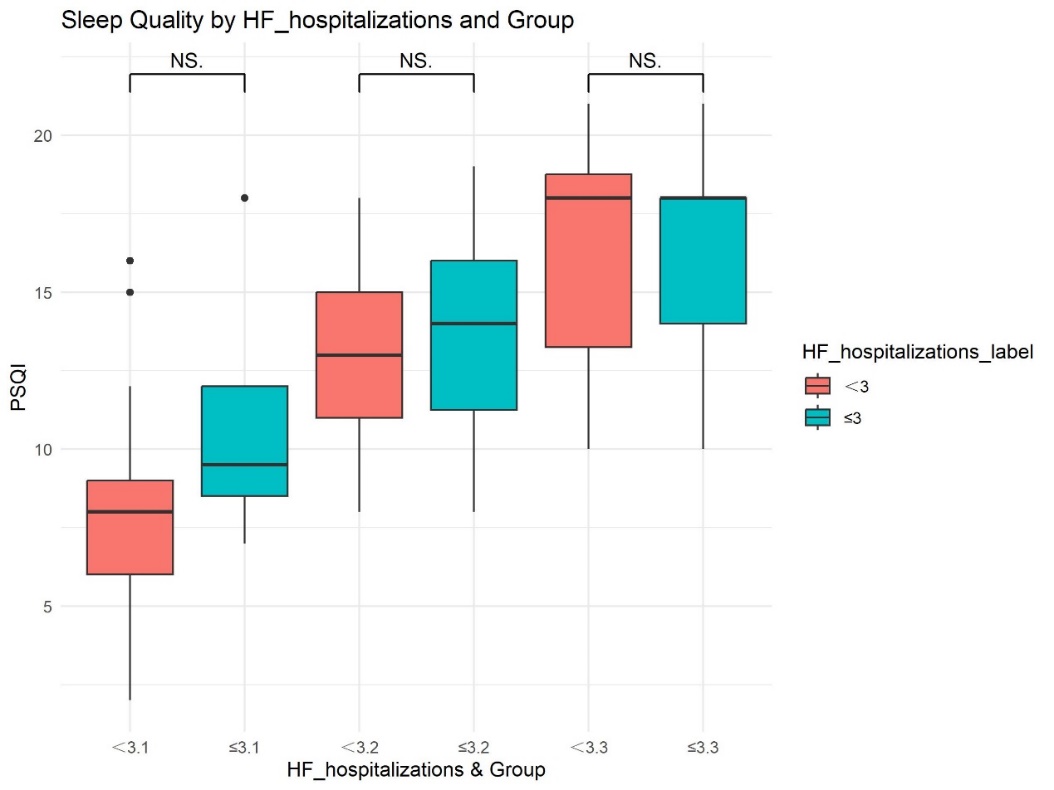


**Figure S8:** NS, Not Significant

Figure S9: Comparison of PSQI total scores for the number of medications between potential classes of sleep patterns in patients with CHF


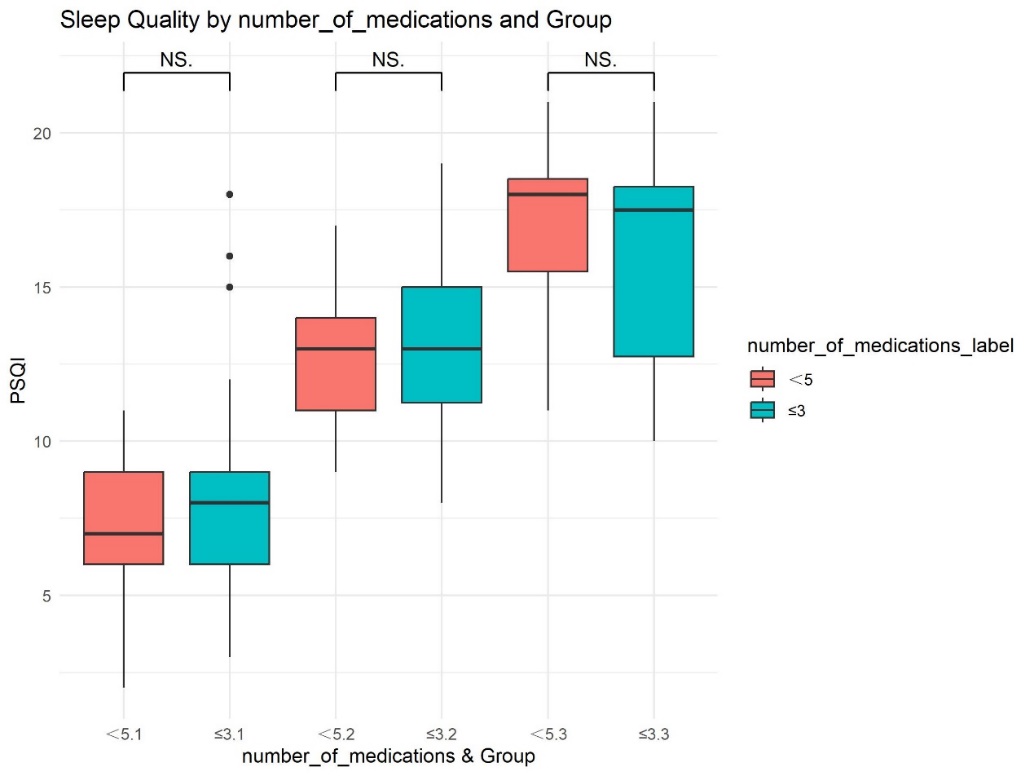


**Figure S9:** NS, Not Significant

Figure S10: Comparison of PSQI total scores for duration of HF between potential classes of sleep patterns in patients with CHF


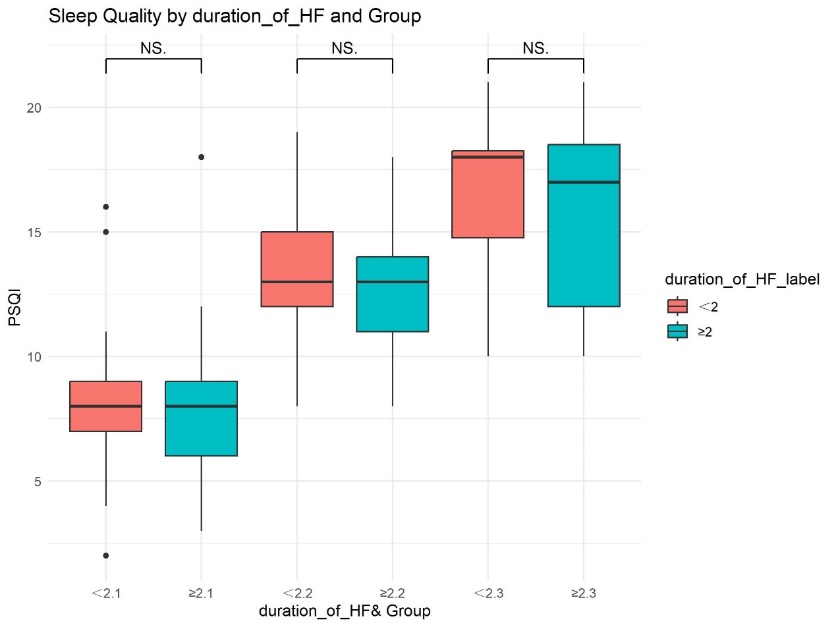


**Figure S10:** NS, Not Significant

Figure S11: Comparison of PSQI total scores for mean hospital duration between potential classes of sleep patterns in patients with CHF


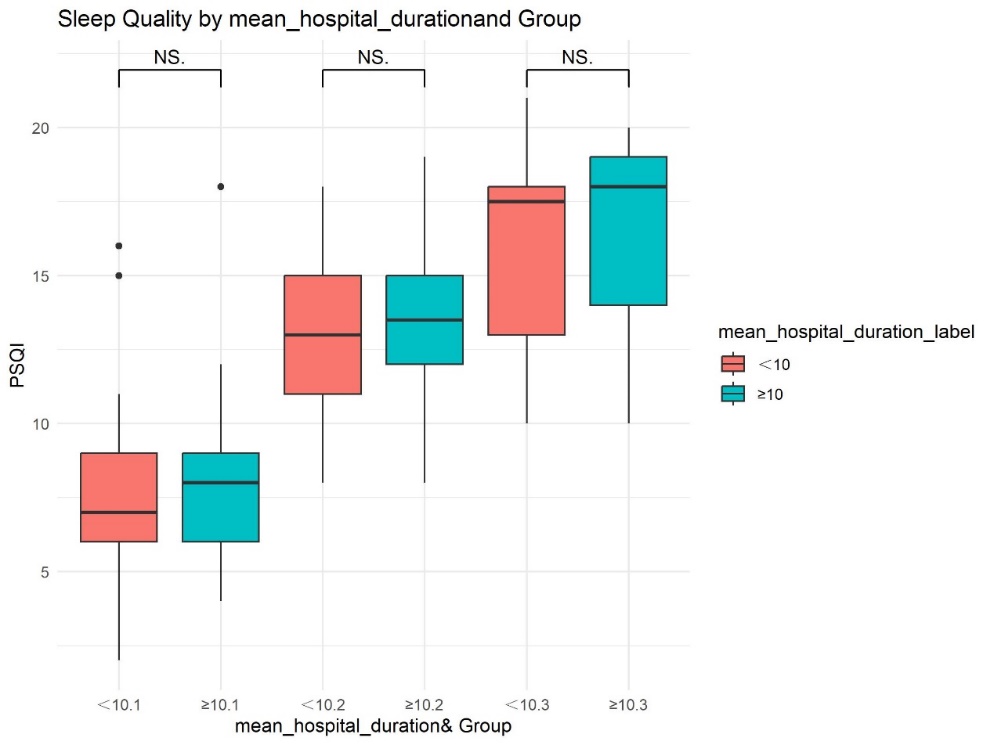


**Figure S11:** NS, Not Significant

Figure S12: Comparison of PSQI total scores for NYHA class between potential classes of sleep patterns in patients with CHF


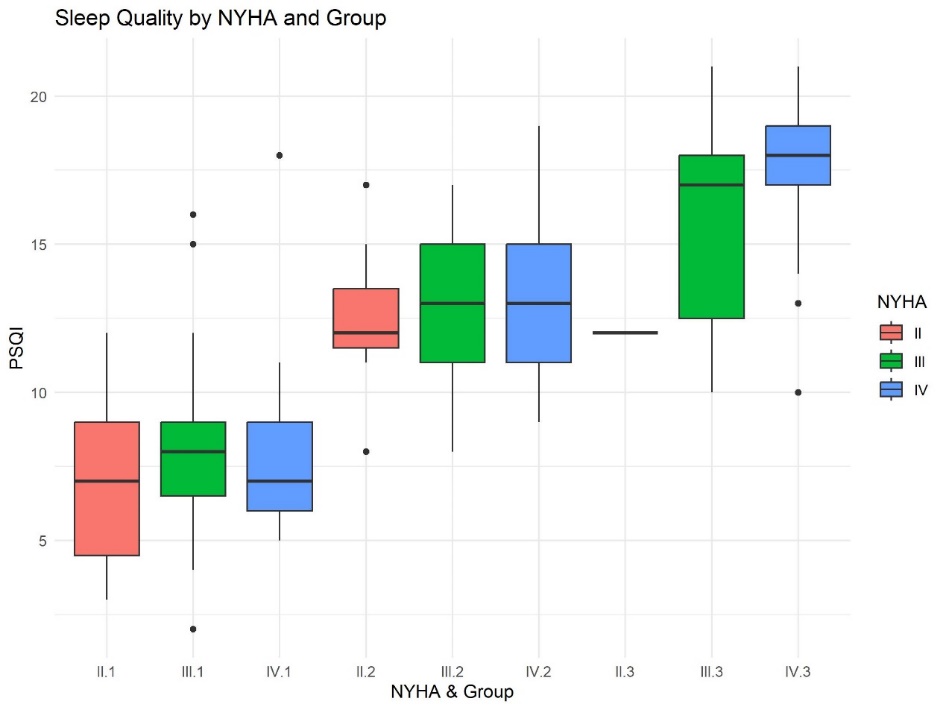


Figure S13: Comparison of PSQI total scores for FoP-Q-SF between potential classes of sleep patterns in patients with CHF


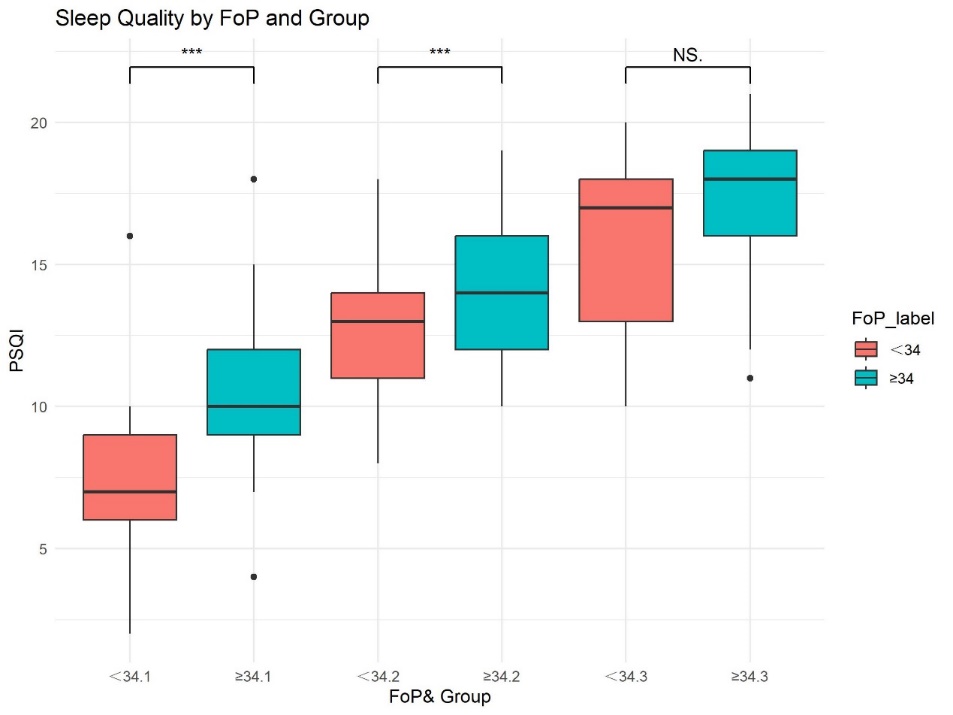


**Figure S13:** ***, P < 0.001; NS, Not Significant
